# Supplementary material for: Synthesis and performance of PdMulti@HCS catalysts with Pd nanoparticles partially embedded in the inner wall of hollow carbon spheres for the direct synthesis of hydrogen peroxide from hydrogen and oxygen
Source: Royal Society of Chemistry journal article supplement (doi:10.1039/d2nj01778d), 2022-01-01
Supplement: d2nj01778d1.pdf [file d2nj01778d1.pdf]

## Supporting Information

### Preparation and performance of Pd<sub>Multi</sub>@HCS catalyst with Pd nanoparticles partially embedded in the inner wall of hollow carbon sphere for the direct synthesis of hydrogen peroxide from hydrogen and oxygen

Yongyong Shi,<sup>abc</sup> Donghai Jiang,<sup>ad</sup> Jingyun Zhao,<sup>abc</sup> Lang Wu,<sup>abc</sup> Chenchen Zhao,<sup>abc</sup> Jun Ma,<sup>abc</sup>  
Hongyan Pan,<sup>\*abc</sup> and Qian Lin<sup>\*abc</sup>

\* Corresponding authors

<sup>a</sup> School of Chemistry and Chemical Engineering, Guizhou University, Guiyang, Guizhou 550025, China

<sup>b</sup> Guizhou Key Laboratory of Green Chemical and Clean Energy Technology, Guiyang, Guizhou 550025, China

<sup>c</sup> Guizhou Engineering Research Center of Efficient Utilization for Industrial Waste, Guiyang, Guizhou 550025, China

<sup>d</sup> School of Chemical Engineering, Guizhou Institute of Technology, Guiyang 550003, China

E-mail: celinqian@126.com, cepanhongyan@163.com

#### Typical synthetic steps for Pd<sub>Multi</sub>@HCS catalysts

##### (1) Preparation of SiO<sub>2</sub> nanospheres by Stöber method

SiO<sub>2</sub> nanosphere as a hard template were synthesized by Stöber method. 4.5ml TEOS was quickly added to a mixed solution of 62ml absolute ethanol, 25ml deionized water and 1.5ml ammonium hydroxide, and the reaction was stirred at 25°C for 2 hours. The products were washed with absolute ethanol and centrifuged one time, and then washed with deionized water and centrifuged three times, which denoted as SiO<sub>2</sub>.

##### (2) SiO<sub>2</sub> nanospheres modified by DMDAAC

The SiO<sub>2</sub> nanospheres were ultrasonically dispersed in 100ml deionized water, then 1.5ml DMDAAC was added and stirred at 35°C for 16h. The products were washed with deionized water and centrifuged three times, which denoted as SiO<sub>2</sub>-DMDAAC.

##### (3) Preparation of Pd<sub>Multi</sub>/SiO<sub>2</sub>-DMDAAC

The SiO<sub>2</sub>-DMDAAC nanospheres were ultrasonically dispersed in 100ml deionized water, and 1ml H<sub>2</sub>PdCl<sub>4</sub> (0.075M) was added and stirred at 35°C for 20h, then 500μl freshly prepared NaBH<sub>4</sub> (10wt%) was added into the solution slowly, and continued stirring at 35°C for 3h. The products were washed with deionized water and centrifuged for three times, and denoted as Pd<sub>Multi</sub>/SiO<sub>2</sub>-DMDAAC.

##### (4) Preparation of Pd<sub>Multi</sub>/SiO<sub>2</sub>-DMDAAC@RF, Pd<sub>Multi</sub>/SiO<sub>2</sub>@C and Pd<sub>Multi</sub>@HCS

Firstly, Pd<sub>Multi</sub>/SiO<sub>2</sub>-DMDAAC nanospheres were ultrasonically dispersed in a mixed solution of 70ml deionized water and 30ml absolute ethanol, and stirred at 35°C for 10min. And 2.0g CTAB, 0.20g resorcinol and 0.2ml ammonium hydroxide were added successively, and stirred at 35°C for 1h. Then 0.286ml of formaldehyde solution was quickly added (resorcinol/formaldehyde (R/F) ratio was controlled to be 0.7), and the self-assembly polymerization reaction was carried out for 16h. The products were washed with absolute ethanol and centrifuged for three times to obtain Pd<sub>Multi</sub>@SiO<sub>2</sub>-DMDAAC@RF nanocomposites, which was dried overnight in an oven at 80°C. The dried products were carbonized at 600°C under N<sub>2</sub> atmosphere for 2h to obtain Pd<sub>Multi</sub>@SiO<sub>2</sub>@C nanocomposites. Then Pd<sub>Multi</sub>@SiO<sub>2</sub>@C

nanocomposites were dispersed in a mixed solution of 35ml deionized water and 5ml hydrofluoric acid and etched at room temperature for 24h to remove silicon. The products were washed with deionized water and centrifuged for three times and dried at 80°C overnight. Finally, the dried products were oxidized for 2h at 250°C in air and reduced for 2.5h at 250°C under H<sub>2</sub> atmosphere. The obtained Pd catalyst with Pd nanoparticles partially embedded in the inner wall of hollow carbon spheres was denoted as Pd<sub>Multi</sub>@HCS.

The above typical synthesis methods were used for the preparation of Pd<sub>Multi</sub>@HCS catalysts with different CTAB mass, but the CTAB mass were 0g, 1.0g, 1.5g, 2.0g and 4.0g, respectively.
